# Supplementary material for: Environmentally friendly screen-printed electrodes for the selective detection of 4-bromo-2,5-dimethoxyphenethylamine (2C-B) in forensic analysis
Source: Royal Society of Chemistry journal article supplement (doi:10.1039/d4ay01310g), 2024-01-01
Supplement: d4ay01310g1.pdf [file d4ay01310g1.pdf]

### Supplementary Information

#### **Environmentally Friendly Screen-Printed Electrodes for the Selective Detection of 4-Bromo-2,5-Dimethoxyphenethylamine (2C-B) in Forensic Analysis**

Anne A. Macedo<sup>a</sup>, Dilton M. Pimentel<sup>b</sup>, Larissa M. A. Melo<sup>a</sup>, Cláudia M. Rocha<sup>c</sup>, Ângelo de Fátima<sup>c,d</sup>, Karla A. O. Souza<sup>e,f</sup>, Jose L. Costa<sup>d,e,g</sup>, Luciano C. Arantes<sup>d,h\*</sup>  
Wallans T. P. dos Santos<sup>h\*</sup>

<sup>a</sup>Departamento de Química, Universidade Federal dos Vales do Jequitinhonha e Mucuri, Campus JK, 39100000, Diamantina, Minas Gerais, Brasil.

<sup>b</sup>Laboratório Integrado de Pesquisas do Vale do Jequitinhonha, Pró-Reitoria de Pesquisa e Pós-Graduação, Universidade Federal dos Vales do Jequitinhonha e Mucuri, Campus JK, 39100000 Diamantina, Minas Gerais, Brasil

<sup>c</sup>Departamento de Química, Instituto de Ciências Exatas, Universidade Federal de Minas Gerais, 31270-901, Belo Horizonte, Minas Gerais, Brasil.

<sup>d</sup>Instituto Nacional de Ciência e Tecnologia sobre Substâncias Psicoativas, 31270-901, Belo Horizonte, Minas Gerais, Brasil.

<sup>e</sup>Centro de Informação e Assistência Toxicológica, Universidade Estadual de Campinas (UNICAMP), 13083-970, Campinas, São Paulo, Brasil

<sup>f</sup>Faculdade de Ciências Médicas, Universidade Estadual de Campinas (UNICAMP), 13084-008, Campinas, São Paulo, Brasil

<sup>g</sup>Faculdade de Ciências Farmacêuticas, Universidade Estadual de Campinas, 13083-871, Campinas, São Paulo, Brasil.

<sup>h</sup>Laboratório de Química e Física Forense, Instituto de Criminalística, Polícia Civil do Distrito Federal, 70610-907, Brasília, Distrito Federal, Brasil.

<sup>i</sup>Departamento de Farmácia, Universidade Federal dos Vales do Jequitinhonha e Mucuri, Campus JK, 39100000, Diamantina, Minas Gerais, Brasil.

\*Corresponding Authors:

Emails: [wallanst@ufvjm.edu.br](mailto:wallanst@ufvjm.edu.br); [lca1969@gmail.com](mailto:lca1969@gmail.com).

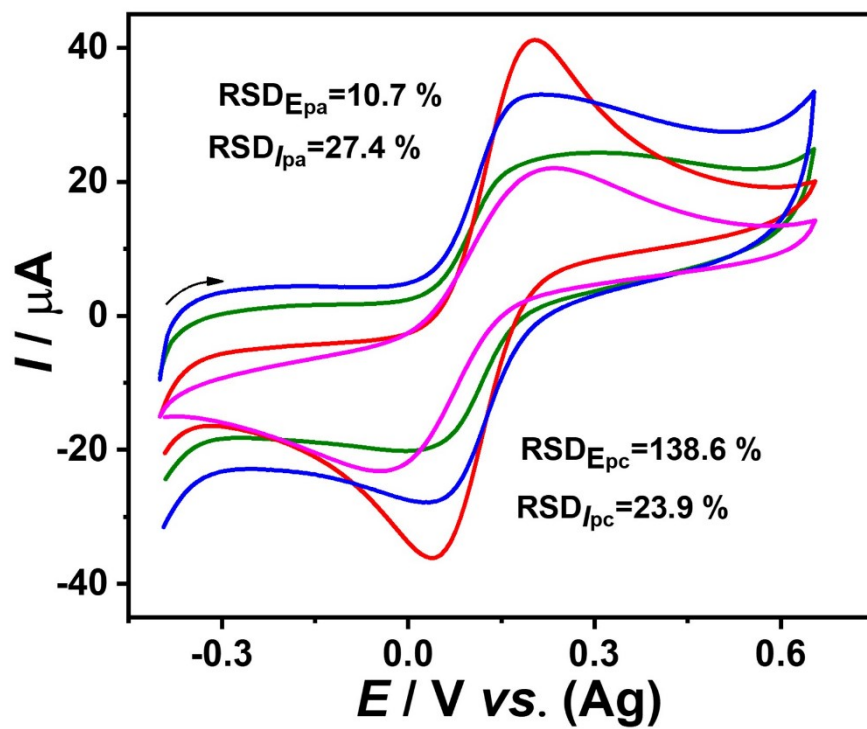

**Figure S1.** Voltammograms obtained for  $1.0 \text{ mmol L}^{-1} [\text{Fe}(\text{CN}_6)]^{3-/4-}$  at  $50 \text{ mV s}^{-1}$ , in four different SPEs-Gr superficially cleaned with acetone.

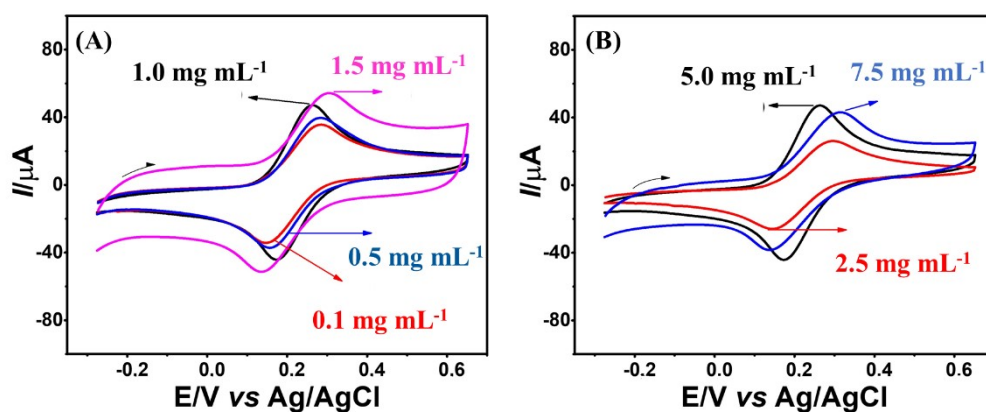

**Figure S2.** CVs obtained using  $1.0 \text{ mmol L}^{-1}$   $[\text{Fe}(\text{CN})_6]^{3-/4-}$  solution in  $0.1 \text{ mol L}^{-1}$  KCl at a scan rate of  $50 \text{ mV s}^{-1}$  on SPE-Gr/CTS (A) while maintaining a constant graphene (Gr) concentration at  $5 \text{ mg mL}^{-1}$  and varying chitosan (CTS) concentrations at (a) 0.1, (b) 0.5, (c) 1.0, and (d)  $1.5 \text{ mg mL}^{-1}$  or (B) maintaining a fixed CTS concentration of  $1.0 \text{ mg mL}^{-1}$  while varying Gr concentrations at (a) 2.5, (b) 5.0 and (c)  $7.5 \text{ mg mL}^{-1}$ .

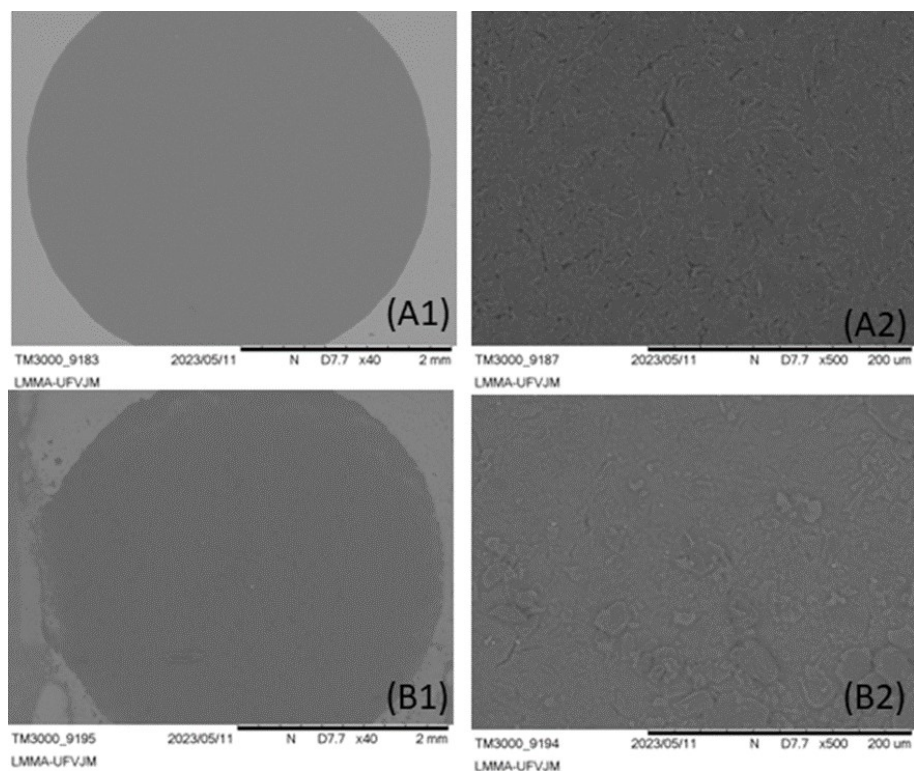

**Figure S3.** Scanning electron microscopy images of the surface morphology of (A) a new SPE-Gr and (B) a modified SPE-Gr/CTS working electrode surfaces at 40x (A1, B1) and 500x (A2, B2) magnification.

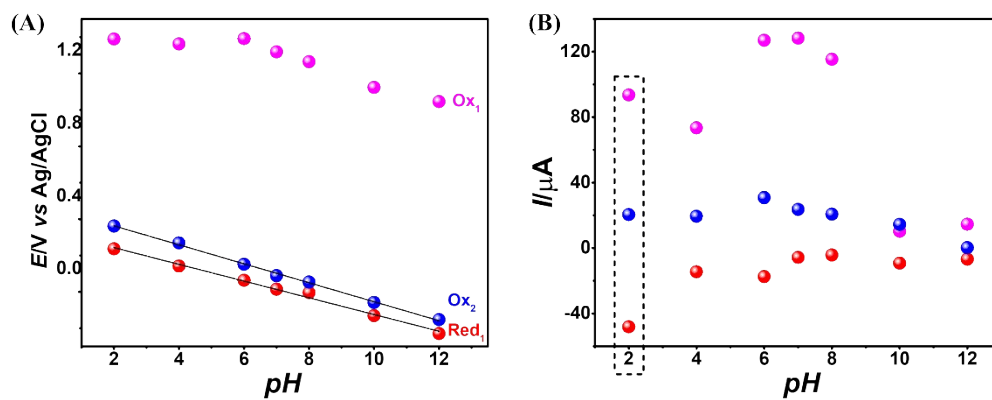

**Figure S4** Plots of (A)  $E_p$  vs. pHs and (B)  $I_p$  vs. pH obtained from data presented in Fig. 5, for the first oxidation (pink dots), reduction (red dots), and second oxidation (blue dots).

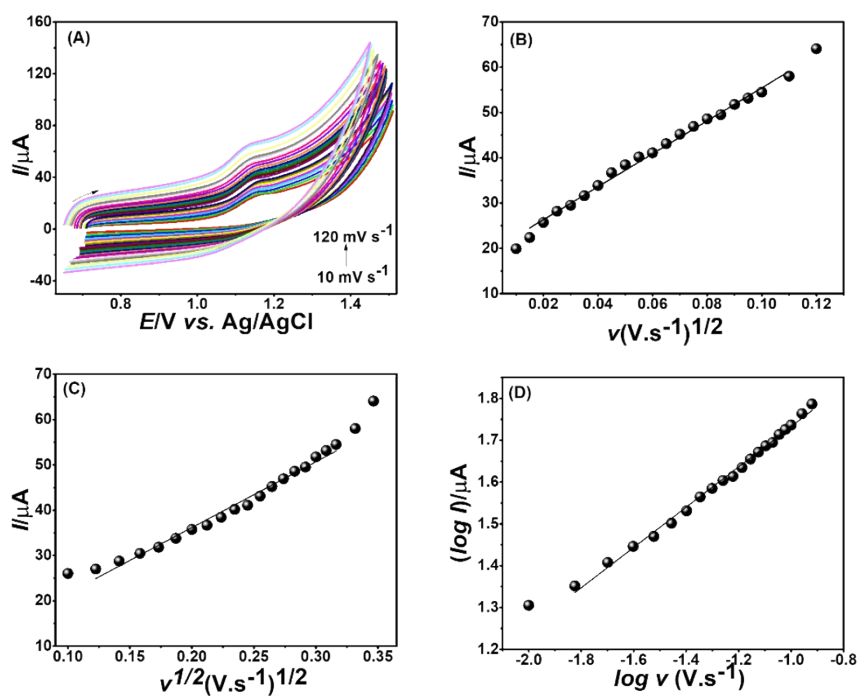

**Figure S5** (A) CVs of 1.0 mol L<sup>-1</sup> 2C-B in 0.1 mol L<sup>-1</sup> BR buffer solution at pH 2.0 on SPE-Gr/CTS. Each potential scans started at 0.0 V, moving in the anodic direction (arrow), with scan rates ( $v$ ) ranging from 5 mV s<sup>-1</sup> to 300 mV s<sup>-1</sup>. Linear regressions of (B)  $I_p$  vs.  $v$ , (C)  $I_p$  vs.  $v^{1/2}$ , and (D) logarithm  $I_p$  vs. logarithm  $v$ .

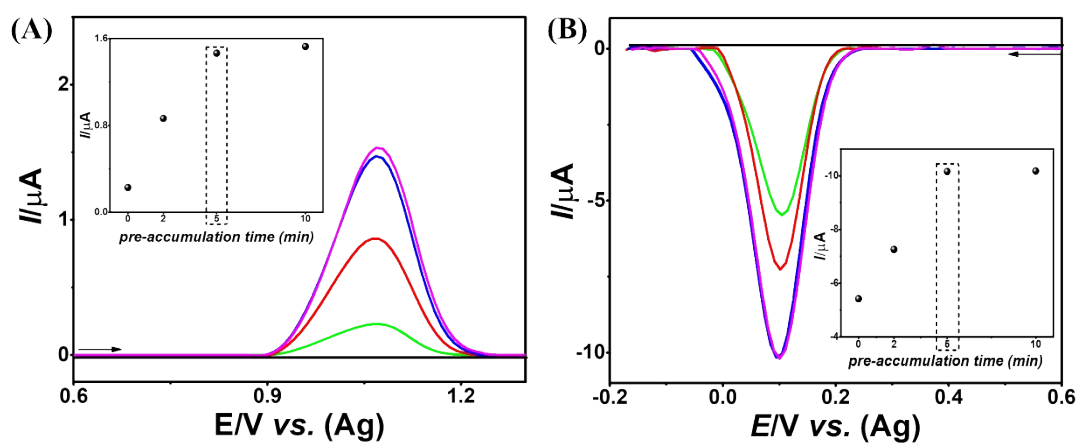

**Figure S6** SWAdSV voltammograms of 2C-B at a concentration of  $7.5 \mu\text{mol L}^{-1}$  in  $0.1 \text{ mol L}^{-1}$  BR buffer solution at pH 2.0 on SPE-Gr/CTS, showing the electrochemical processes for oxidation (A) and reduction (B) separately. Experimental conditions: amplitude of 80 mV, step potential of 10 mV, frequency of 30Hz. The pre-accumulation time ranged from 0 to 10 min. The inset illustrates the dependency of electrochemical behavior on the duration of the *pre-accumulation time*.

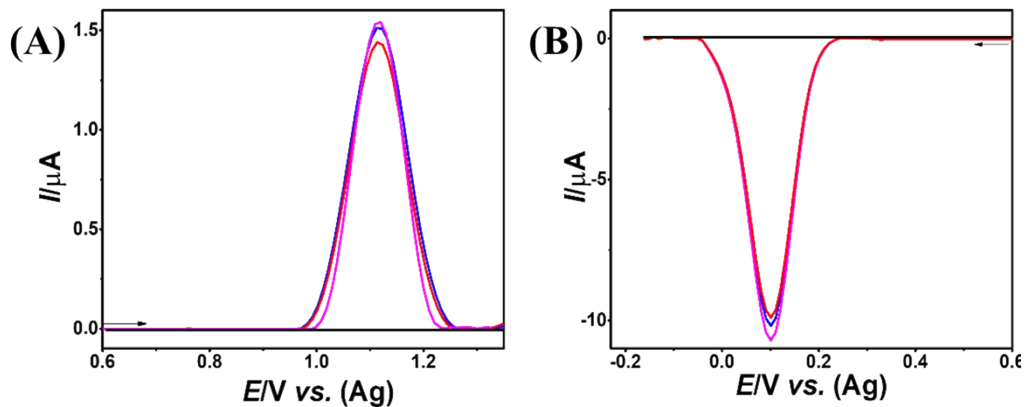

**Figure S7** SWAdSV voltammograms of 2C-B at concentration of  $7.5 \mu\text{mol L}^{-1}$  in  $0.1 \text{ mol L}^{-1}$  BR buffer solution at pH 2.0 on SPE-Gr/CTS, showing the electrochemical processes without application of potential (magenta line) during pre-accumulation, with application of 0.5V for 30s (blue line), and with application of -0.5V for 30s (red line), shown separately for **(A)** anodic and **(B)** cathodic scan. Experimental conditions: amplitude of 80 mV, step potential of 10 mV, frequency of 30Hz, pre-accumulation time of 5min.

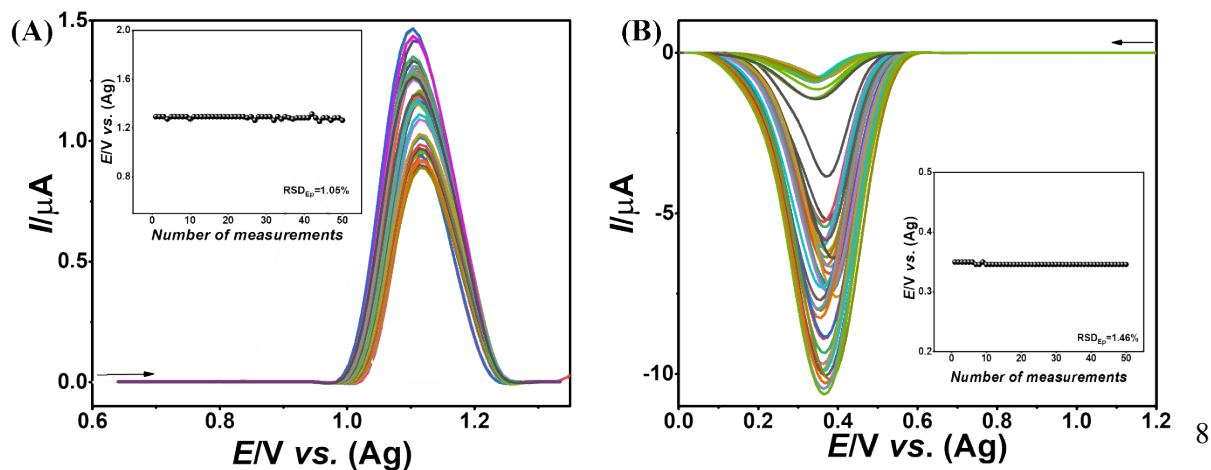



**Figure S8** Voltammograms profiles from 50 consecutive measurements of  $7.5 \mu\text{mol L}^{-1}$  2C-B in  $0.1 \text{ mol L}^{-1}$  BR buffer pH 2.0 on the same SPE-Gr/CTS, showing separately for (A) anodic and (B) cathodic scans. Experimental conditions are the same as in Fig.4. Insets are plots of  $E_{pa_2}$  and  $E_{pc_1}$  vs. the number of measurements performed on SPE-Gr/CTS, highlighting the stability and reproducibility of the electrode's performance over repeated use.

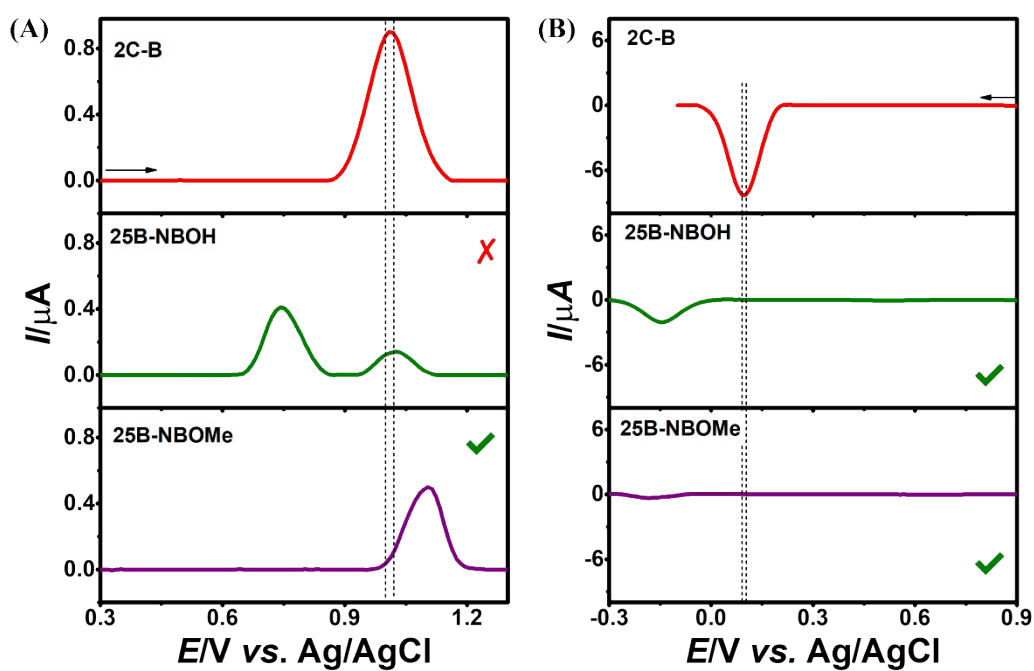

**Figure S9** Voltammograms profiles on SPE-Gr/CTS for 2C-B (red-line), 25B-NBOH (olive line), 25B-NBOMe (purple line) at a concentration of  $5 \mu\text{mol L}^{-1}$  in  $0.1 \text{ mol L}^{-1}$  BR buffer at pH 2.0, displayed for both (A) anodic and (B) cathodic scans. Experimental conditions are the same as in Fig. 6.

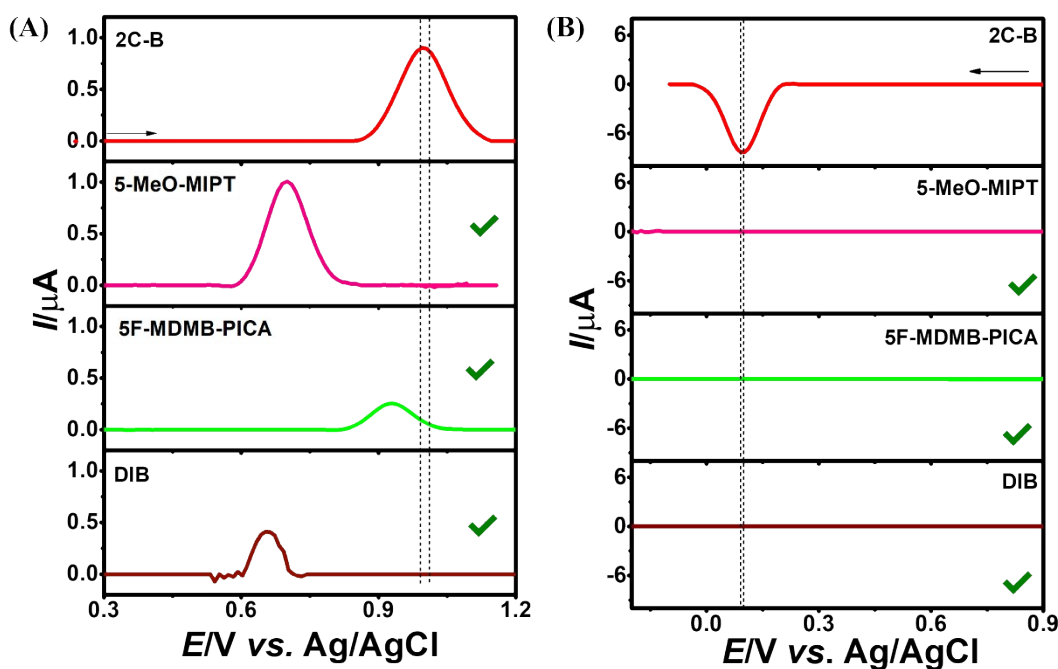

**Figure S10** SWAdSV voltammograms on SPE-Gr/CTS for 2C-B (red line), 5-MeO-MIPT (pink line), 5F-MDMB-PICA (green line), and dibutylone (brown line) at a concentration of  $5 \mu\text{mol L}^{-1}$  in  $0.1 \text{ mol L}^{-1}$  BR buffer at pH 2.0, displayed for both (A) anodic and (B) cathodic scans. The experimental conditions are the same as in Fig.6. All drugs.

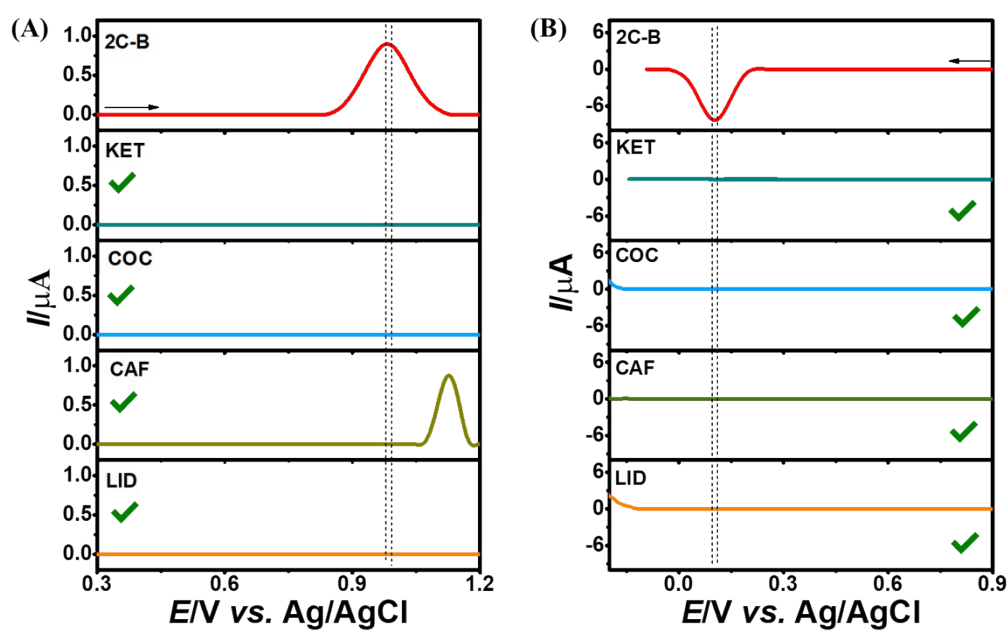

**Figure S11.** SWAdSV voltammograms on SPE-Gr/CTS for 2C-B (red line), ketamine (light gray line), cocaine (light blue line), caffeine (light brown line), and lidocaine (dark yellow line) at a concentration of  $5 \mu\text{mol L}^{-1}$  in  $0.1 \text{ mol L}^{-1}$  BR buffer at pH 2.0, displayed for both (A) anodic and (B) cathodic scans. The experimental conditions are the same as in Fig. 6.

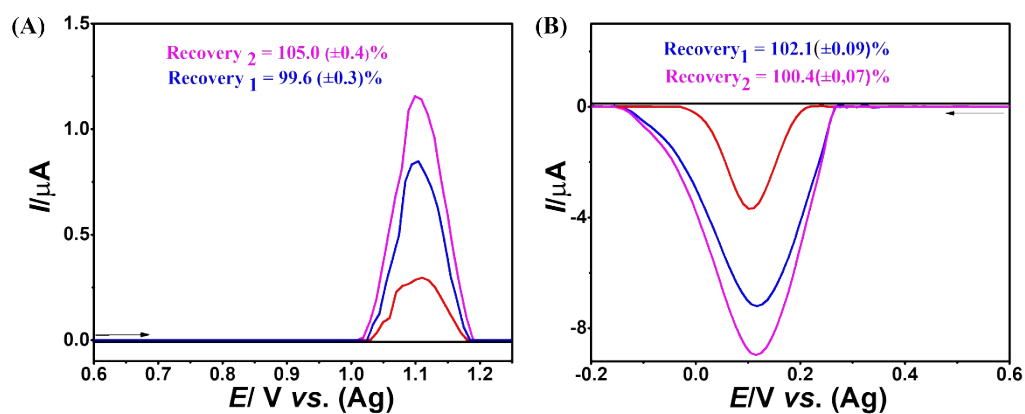

**Figure S12** Voltammograms profiles in 0.1 mol L<sup>-1</sup> BR buffer solution at pH 2.0 on SPE-Gr/CTS: before (black lines) and after the addition of a real seized sample (red lines), and following the addition of standard solutions of 2C-B at concentrations of 2.5 μmol L<sup>-1</sup> (blue

lines) and  $3.5 \mu\text{mol L}^{-1}$  (magenta lines), using both (A) anodic and (B) cathodic scans. Experimental conditions are the same as in Fig. 6. Insets are the obtained recovery values.

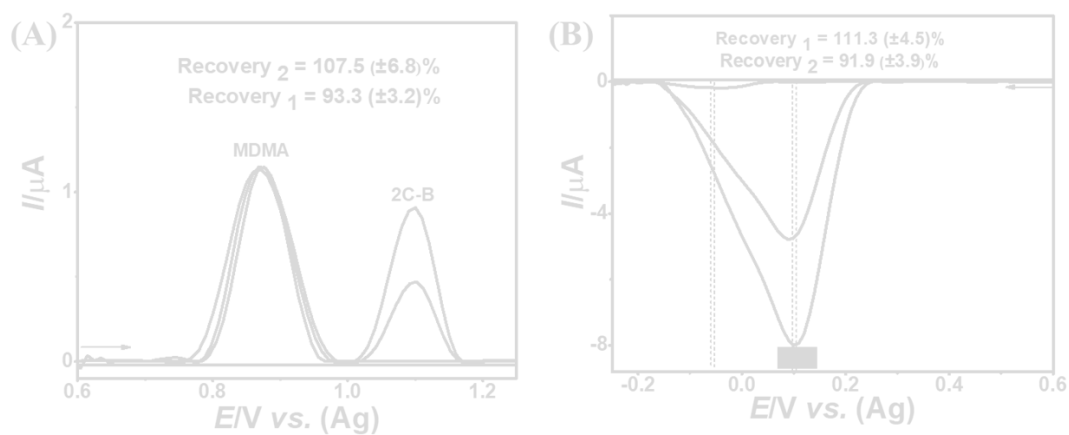

**Figure S13.** SWAdSVs profiles in  $0.1 \text{ mol L}^{-1}$  BR buffer solution at pH 2.0 on SPE-Gr/CTS: before (black lines) and after the addition of a real oral fluid sample (red lines) and following the addition of standard solutions of 2C-B at concentrations of  $2.5 \mu\text{mol L}^{-1}$  (blue lines) and

5.0  $\mu\text{mol L}^{-1}$  (magenta lines), using both (A) anodic and (B) cathodic scans. Experimental conditions are the same as in Fig. 6. Insets are the obtained recovery values.
